# Supplementary material for: Quantitative Assessment and Impact Analysis of Land Surface Deformation in Wuxi Based on PS-InSAR and GARCH Model
Source: MDPI journal article supplement (doi:10.3390/rs16091568), 2024-04-28
Supplement: s1 [file s1]

Although real ground deformation data for the Wuxi area cannot be obtained, this paper verifies the accuracy of PS-InSAR by extracting temporal displacement data from Sentinel-1 satellite datasets I and II for the same period. The specific imaging parameters and characteristics of the datasets are shown in Table S1.

**Table S1.** Specific parameters of sentinel-1A datasets.

| Datasets         | Dataset I       | Dataset II      |
|------------------|-----------------|-----------------|
| Incidence angle  | 42.8°           | 42.8°           |
| Beam mode        | IW              | IW              |
| Flight direction | Ascending       | Ascending       |
| Polarization     | VV              | VV              |
| Time range       | 2015.12-2018.12 | 2016.12-2017.12 |

In this research, Datasets I and II were separately subjected to the PS-InSAR processing to acquire two sequences of time-series displacement data. Extracting and comparing the displacement data from the same time span in Datasets I and II reveals that both their deformation trends and magnitudes are closely aligned. The scatter plot, as shown in Figure S1c, indicates a correlation coefficient of 0.69, with an average error in cumulative displacement of 3.673mm and a standard deviation of 4.486mm, which directly substantiates the widespread consistency of the two sets of results.。

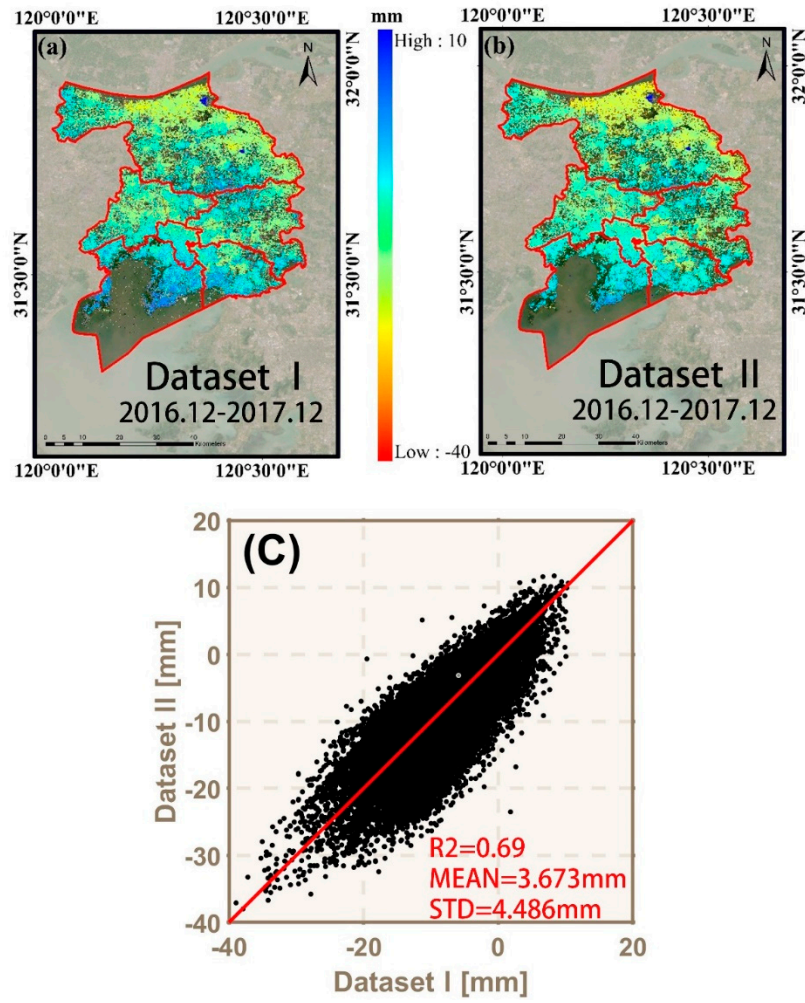

**Figure S1.** Cross-validation results. The deformation magnitude of Dataset I during the period from December 2016 to December 2017 (a). The deformation magnitude of Dataset II during the same period (b). Scatter comparison between Dataset I and II (LOS direction) (c).
